# Supplementary material
Source: PubMed Central journal article supplement (PMC6866047)
Supplement: MCN-14-e12624-s001.pdf [file MCN-14-e12624-s001.pdf]

(A)

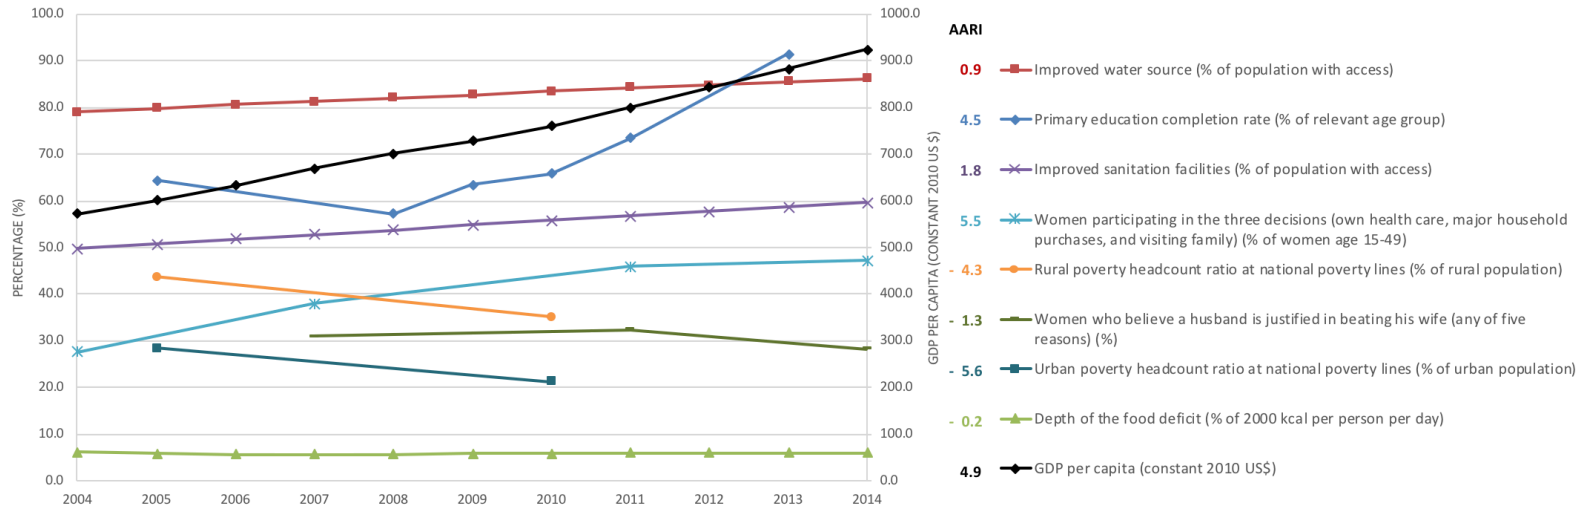

(B)

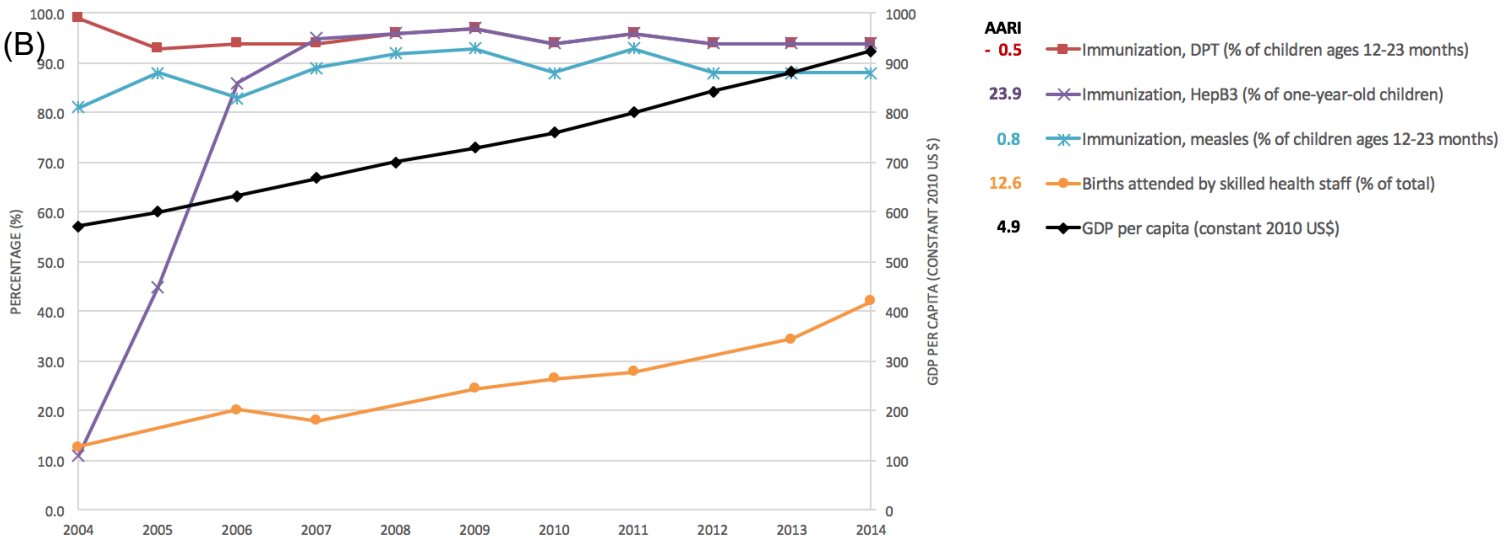

(C)

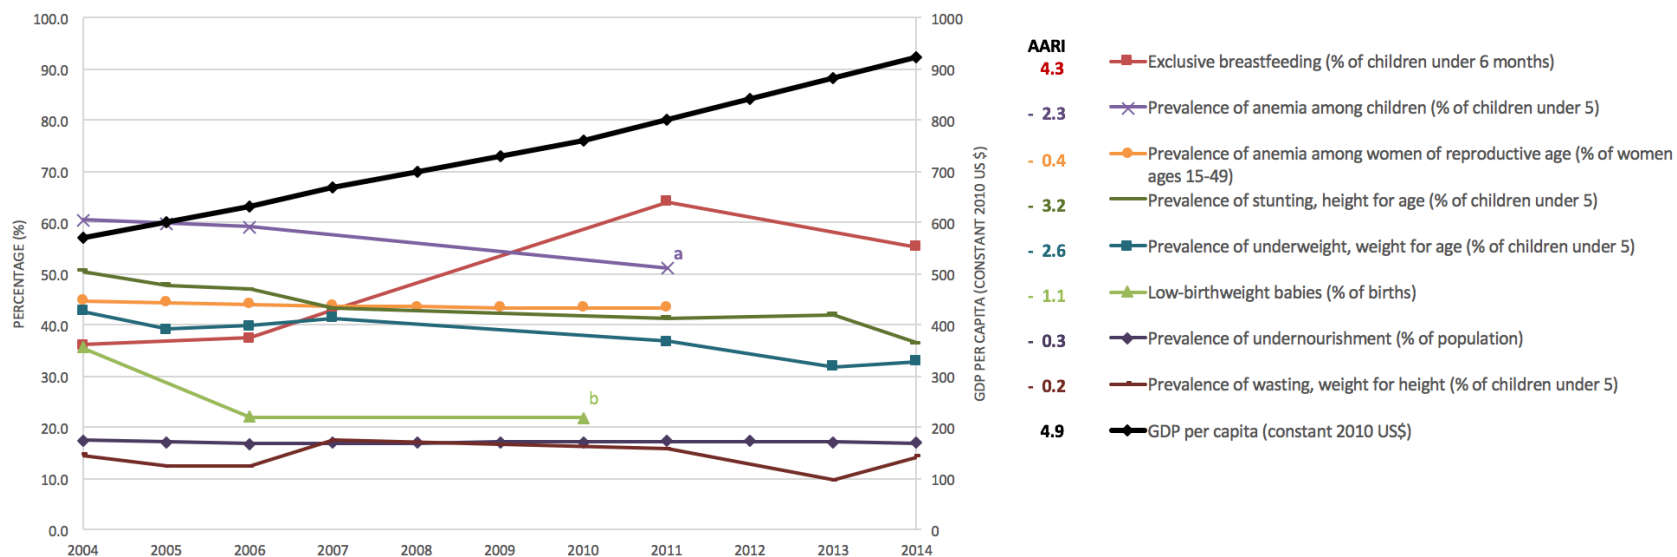

**Supplemental Figure 1:** Changes in (A) socio-economic status; (B) child health indicators; and (C) maternal and child nutritional status between 2004- 2014 in Bangladesh. Data is extracted from World Bank Databank, unless otherwise indicated: a. Lee 2013 and b. BDHS 2011

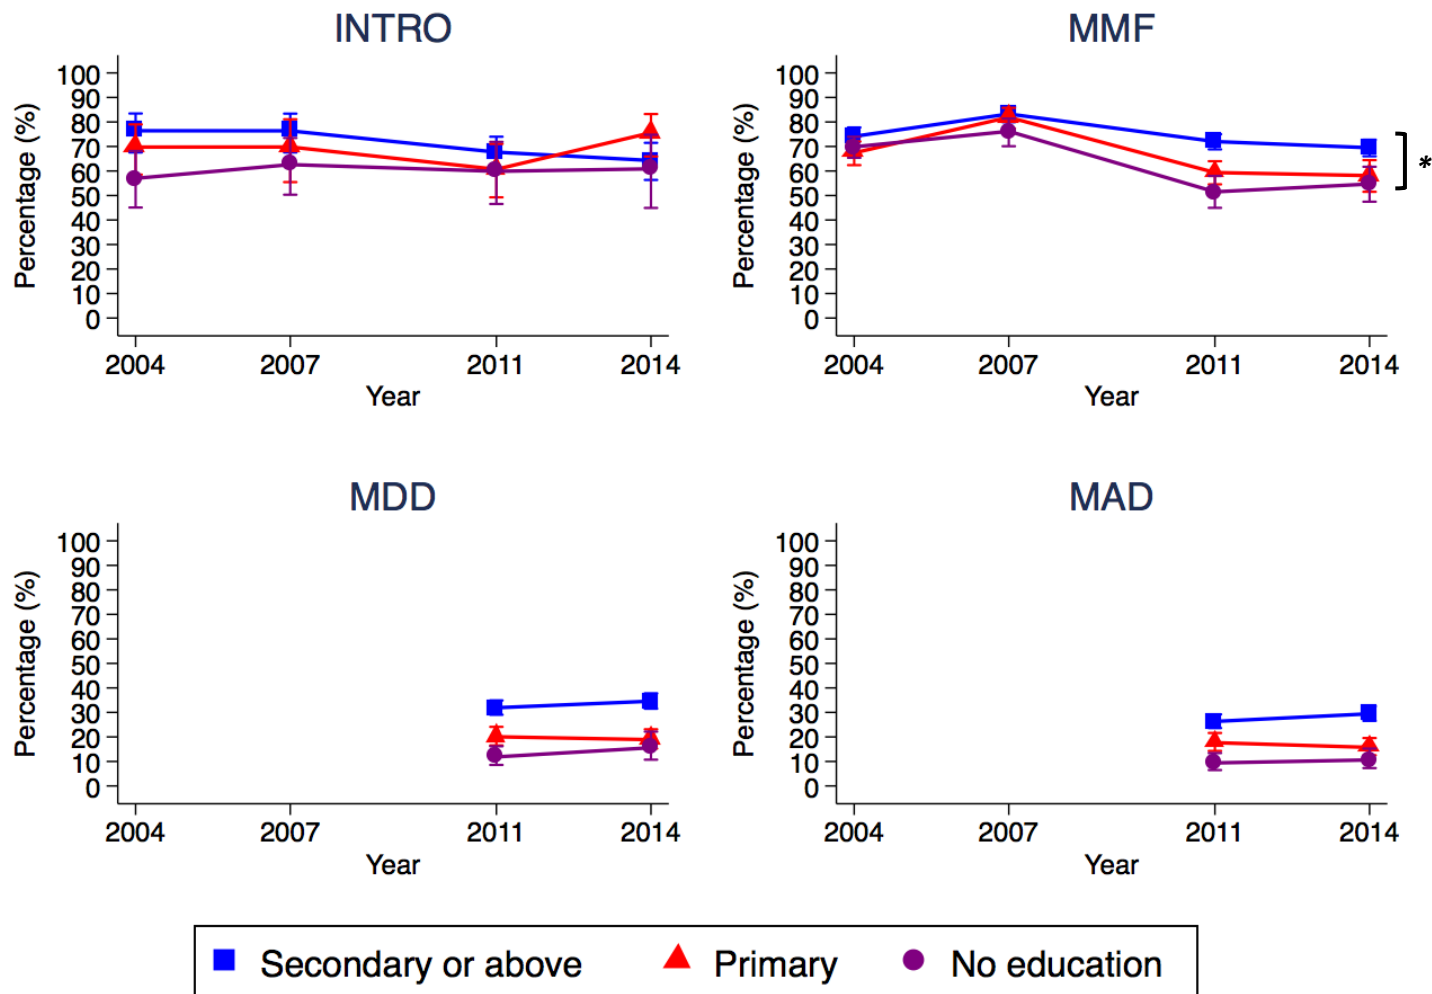

**Supplemental Figure 2:** Proportion of meeting complementary feeding criteria by maternal education

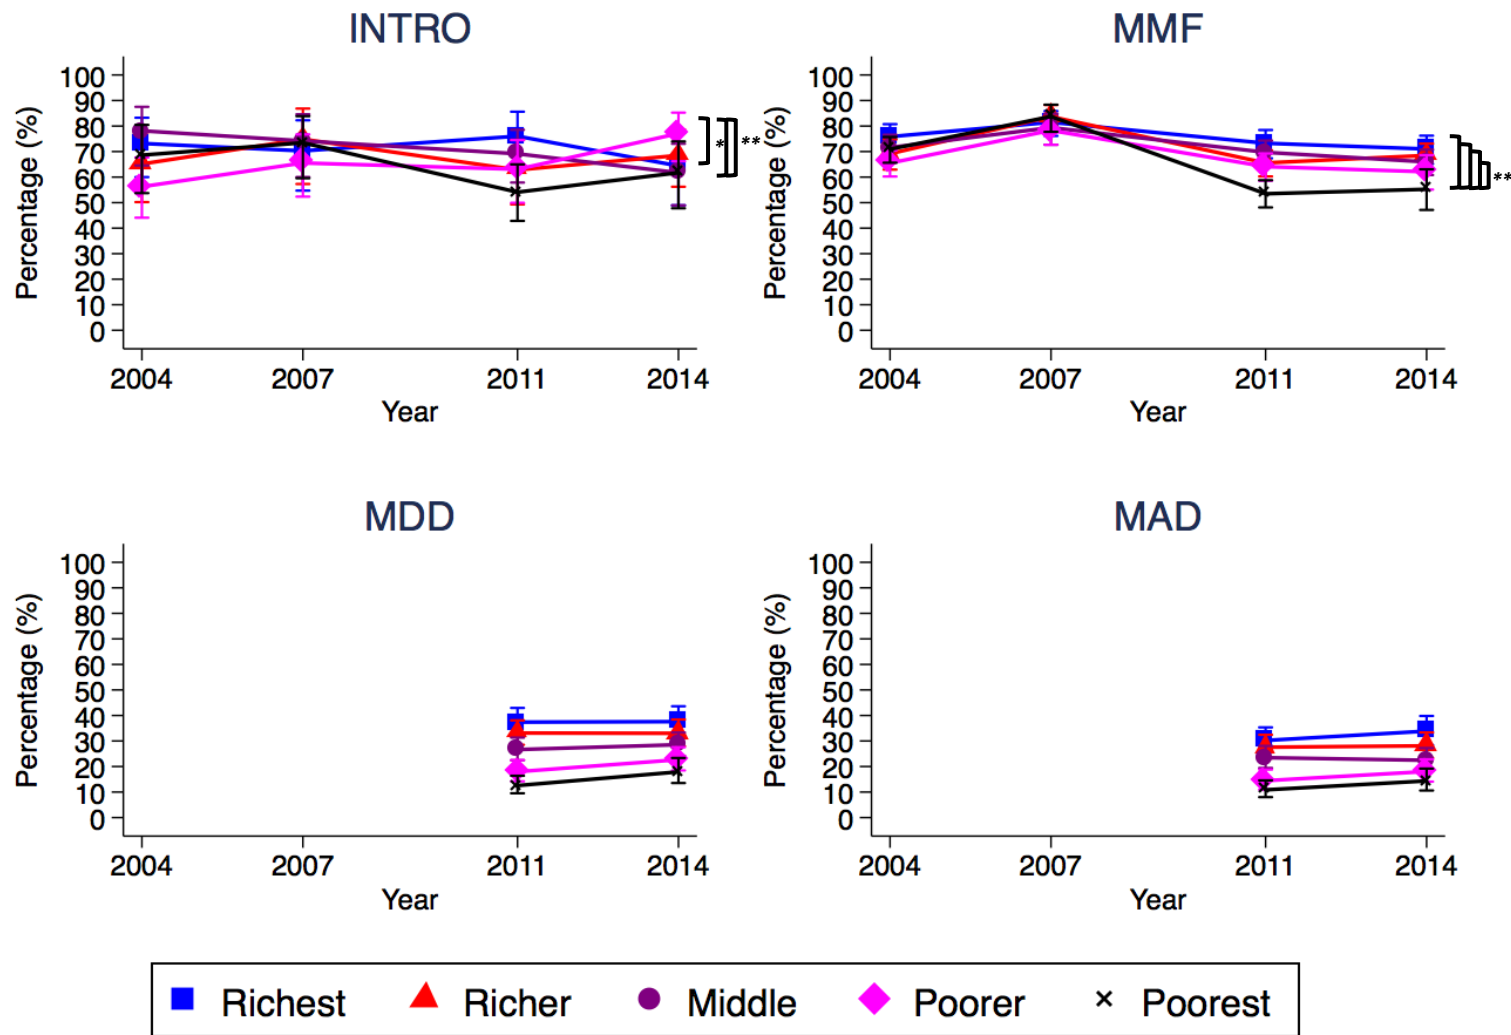

**Supplemental Figure 3:** Proportion of meeting complementary feeding criteria by household wealth

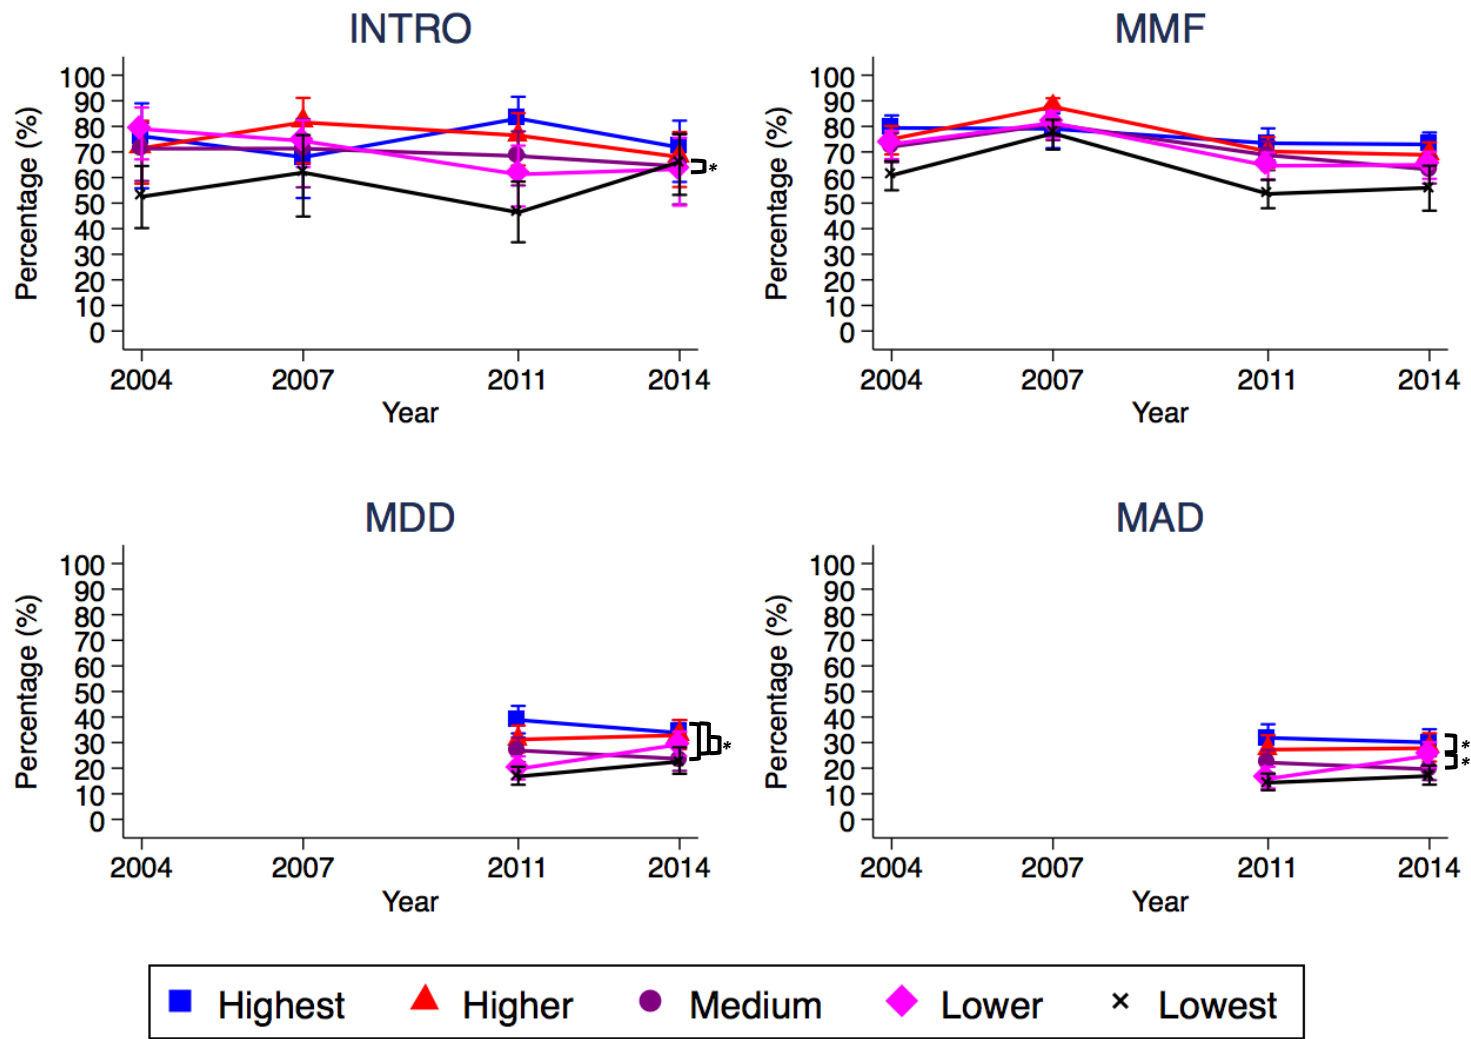

**Supplemental Figure 4:** Proportion of meeting complementary feeding criteria by community-level access to health care

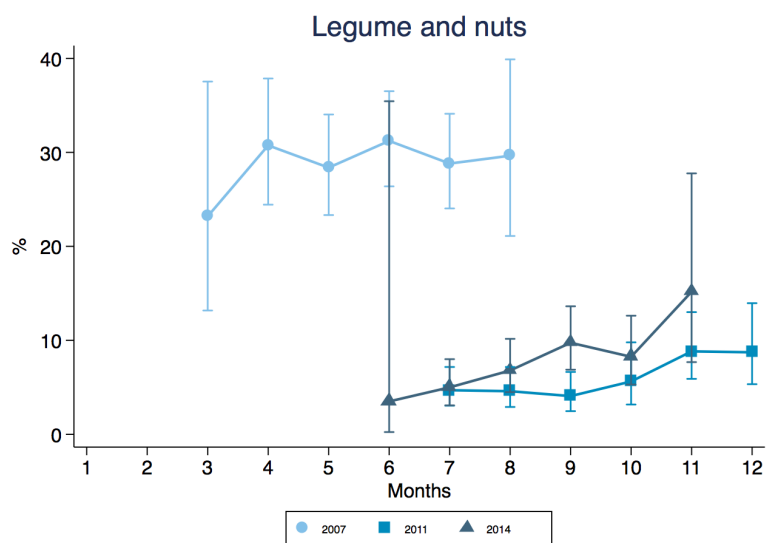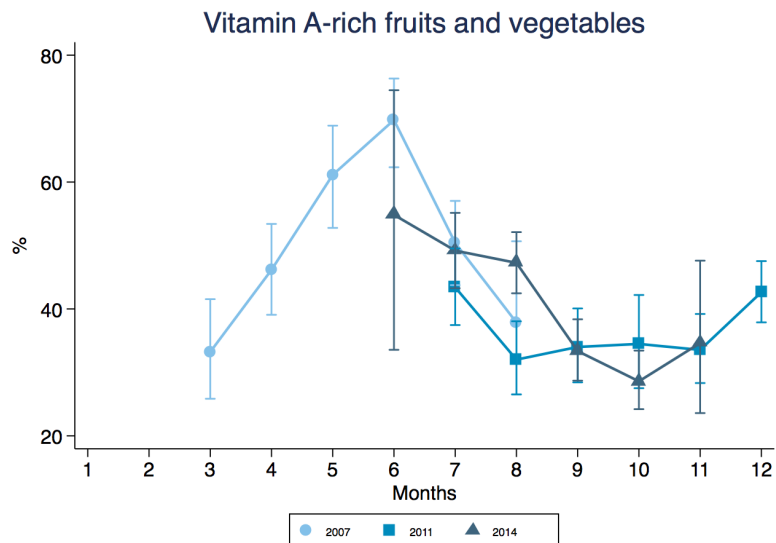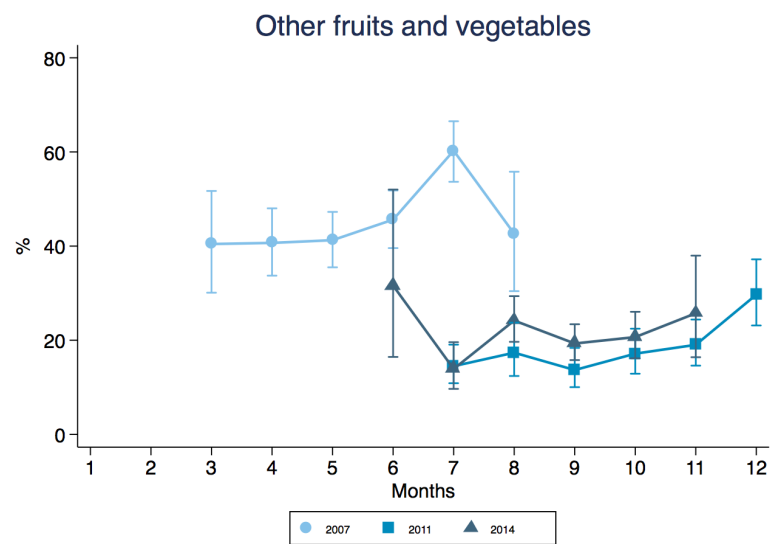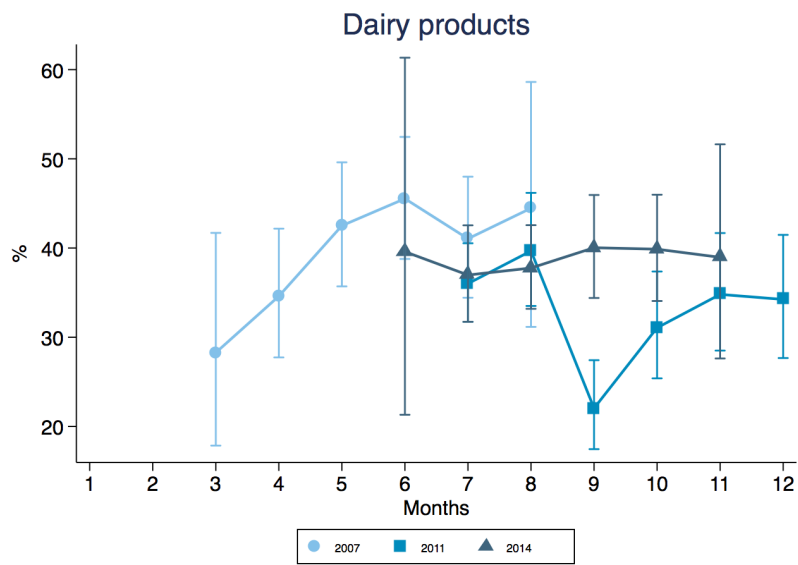

**Supplemental Figure 5:** Proportion of food group consumption in 2007, 2011 and 2014 by survey months

## 6-23 months

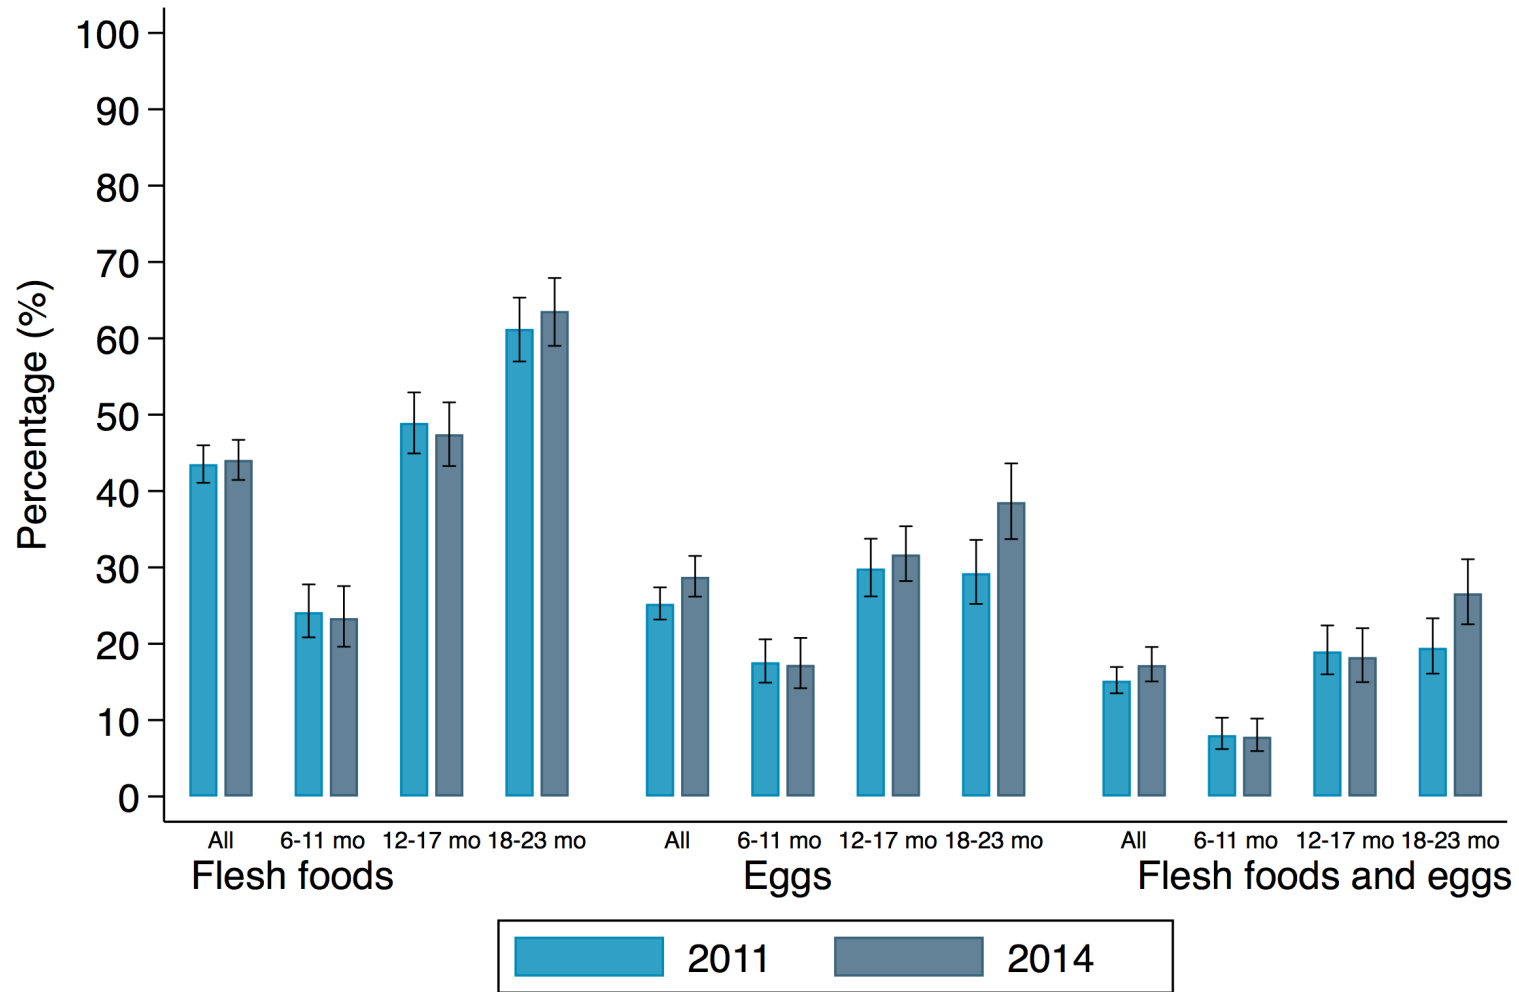

**Supplemental Figure 6:** Proportion of flesh foods and eggs consumption in 2011 and 2014
